# Supplementary material
Source: publisher figshare collection journal article supplement (https://acs.figshare.com/ndownloader/files/6979478)
Supplement: Supplementary file 1 [file 6979478]

## Quinine Acesulfamates

Jianhui Li,<sup>†</sup> Xue Fu,<sup>†</sup> Jiaoyang Li,<sup>‡</sup> Minmin Kong,<sup>†</sup> Huaguang Yu,<sup>§</sup> Jianming Wang,<sup>‡</sup>  
Zongwu Deng<sup>†</sup> and Hailu Zhang<sup>\*,†</sup>

<sup>†</sup> Laboratory of Magnetic Resonance Spectroscopy and Imaging, Suzhou Institute of Nano-Tech and Nano-Bionics, Chinese Academy of Sciences, Suzhou 215123, P.R. China.

<sup>‡</sup> Crystal Pharmatech, Suzhou Industrial Park, Suzhou 215123, P.R. China.

<sup>§</sup> College of Physics Science and Technology, Yangzhou University, Yangzhou 225002, P.R. China.

---

\* Corresponding author:

Tel.: +86-512-62872713, Fax: +86-512-62603079, E-mail address:  
hlzhang2008@sinano.ac.cn.

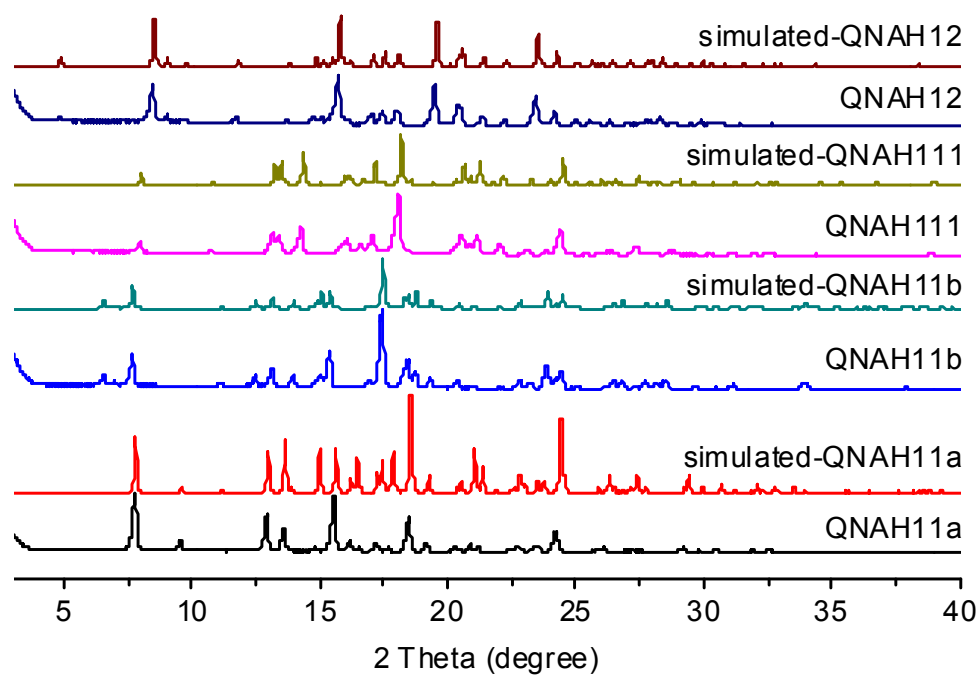

**Figure S1.** Experimental and simulated powder XRD patterns of QNAH11a, QNAH11b, QNAH111, and QNAH12.

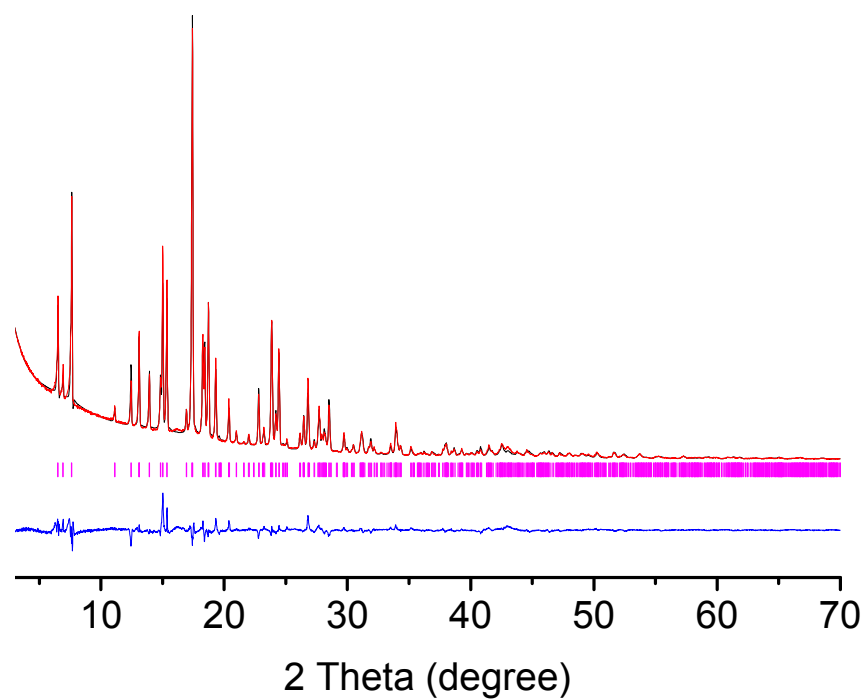

**Figure S2.** Experimental powder XRD pattern (red), Rietveld simulated powder XRD pattern (black), and their difference profile (blue) of QNAH11b. The observed reflections are also marked (darkcyan). Residual variances:  $R_{wp} = 5.96\%$ ,  $R_p = 4.26\%$ .

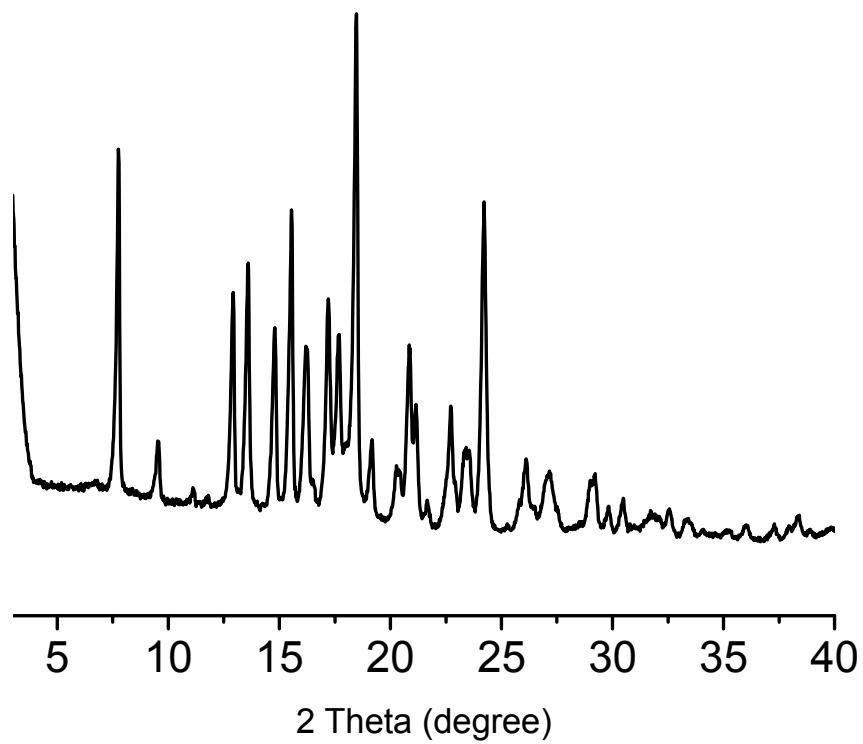

**Figure S3.** Powder XRD pattern of QNAH111 after dehydration.

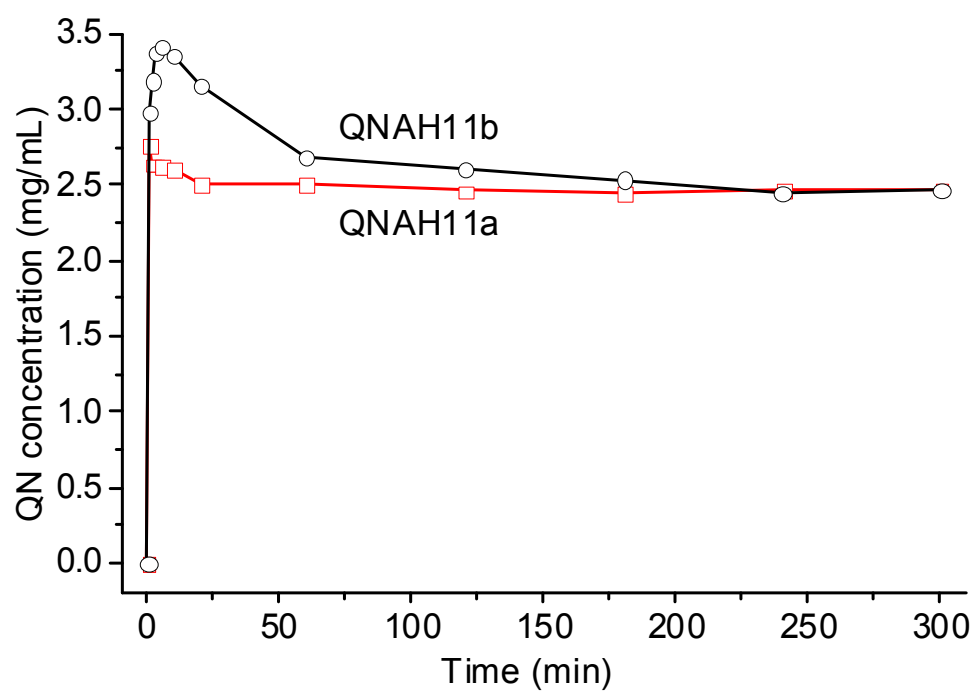

**Figure S4.** Dissolution curves of QNAH11a and QNAH11b in water at 37 °C.

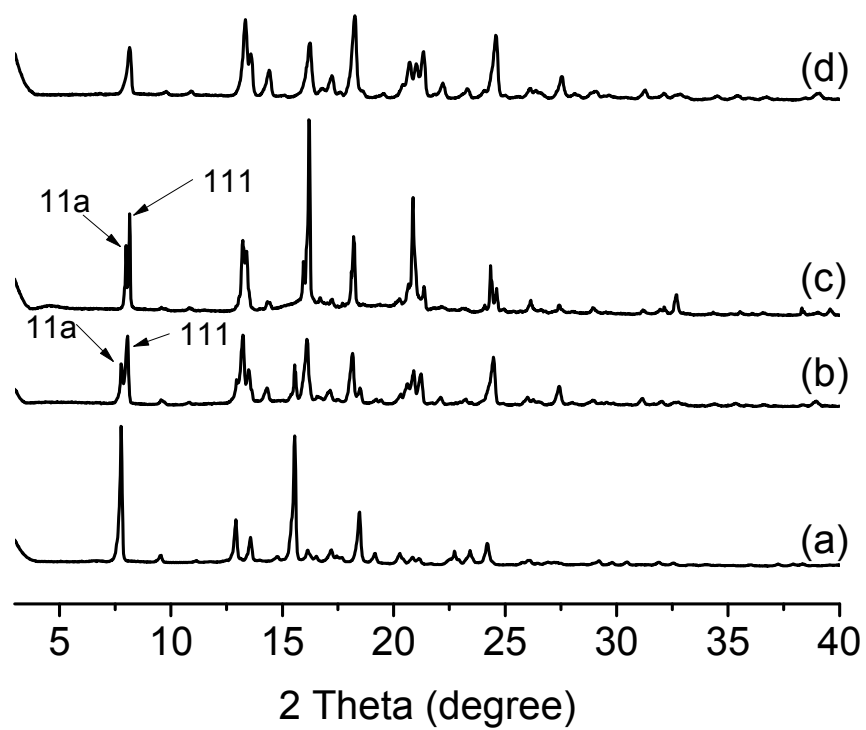

**Figure S5.** Powder XRD pattern of QNAH11a after moisture stability test under 40% (a), 60% (b), 75% RH (d), and QNAH111 after moisture stability test under 60% RH (c).

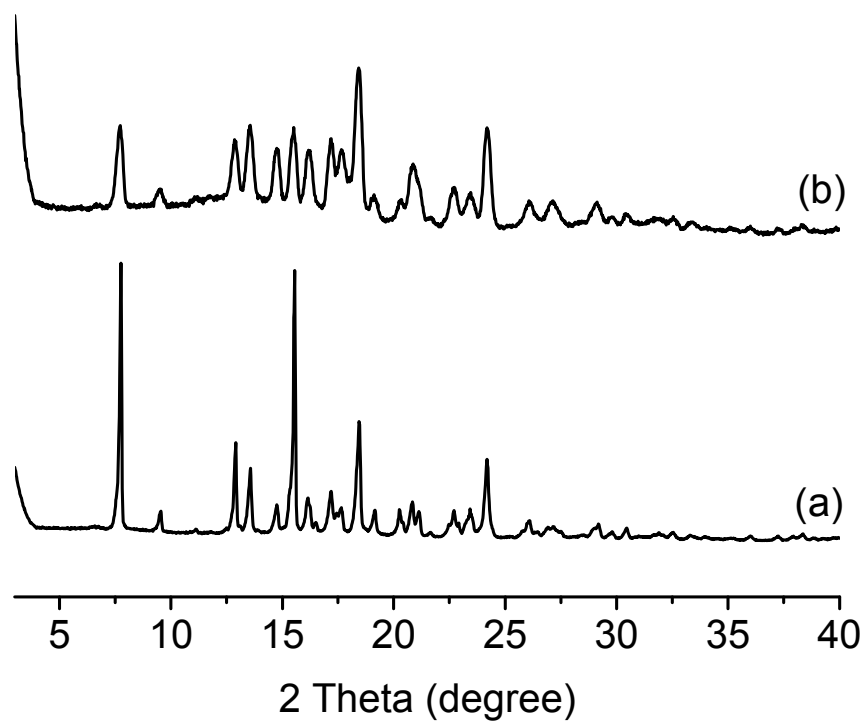

**Figure S6.** Powder XRD pattern of QNAH11a obtained from QNAH111 (a) under condition e (see **Scheme 3** in the main text), and from QNAH11b (b) under condition f (see **Scheme 3** in the main text).

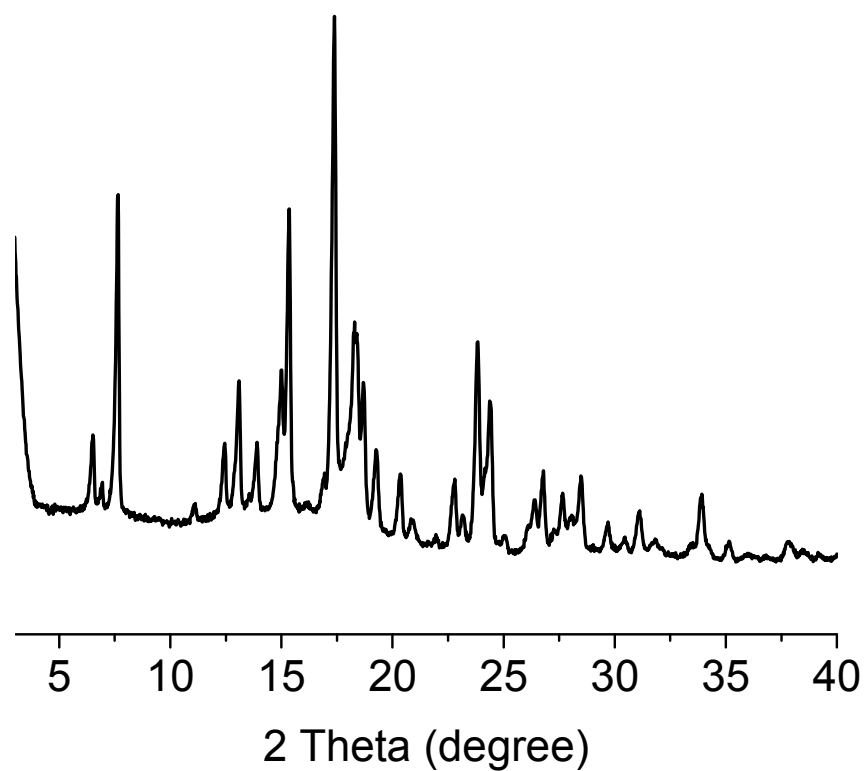

**Figure S7.** Powder XRD pattern of QNAH11b obtained from QNAH12 under condition b (see **Scheme 3** in the main text).

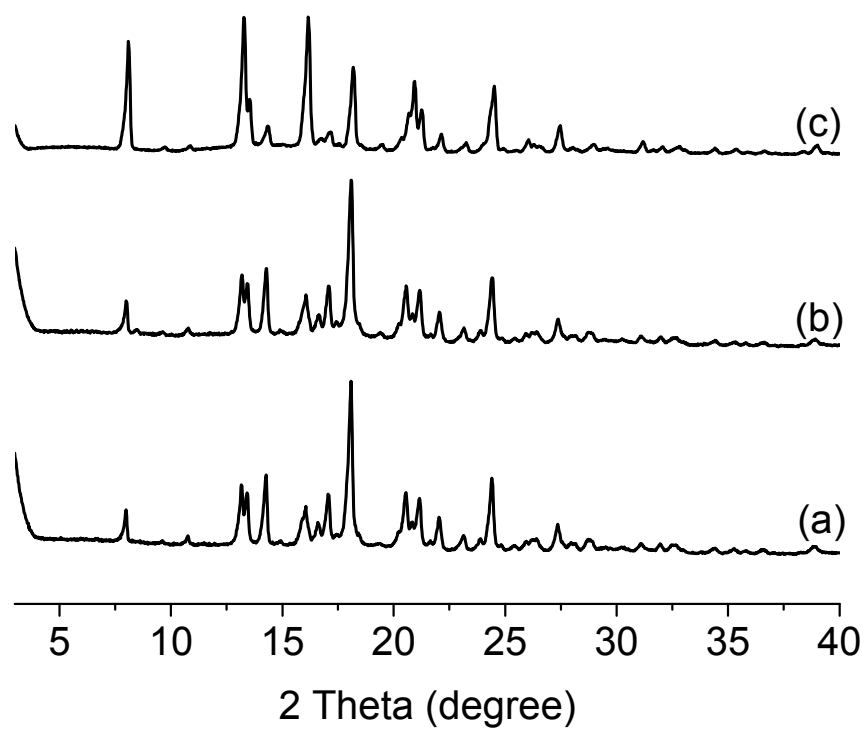

**Figure S8.** Powder XRD pattern of QNAH111 obtained from QNAH11a (a) under condition b (see **Scheme 3** in the main text), from QNAH11b (b) under condition b (see **Scheme 3** in the main text), and from QNAH12 (c) under condition c (see **Scheme 3** in the main text).

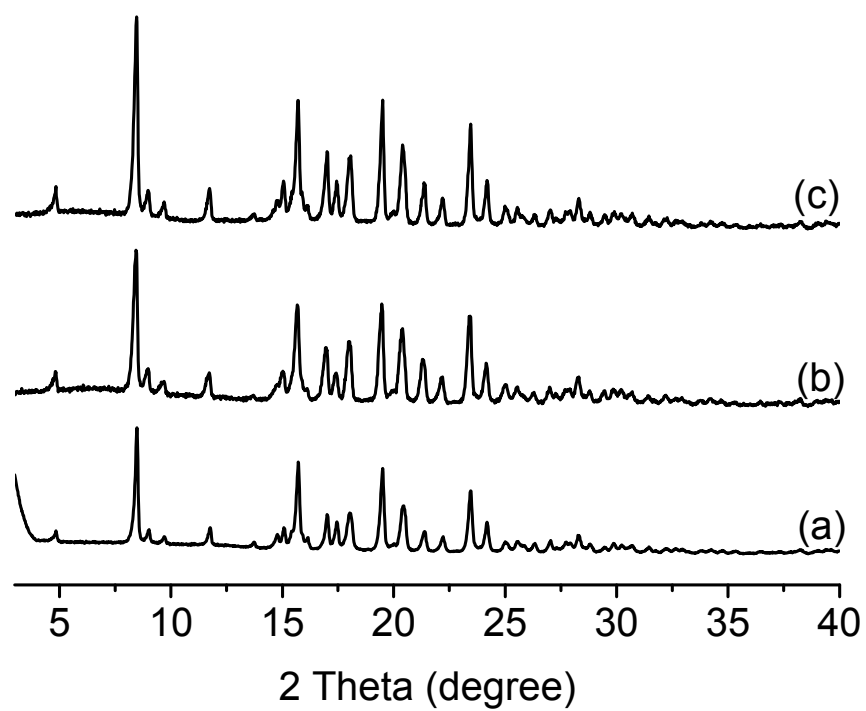

**Figure S9.** Powder XRD pattern of QNAH11 obtained from QNAH11a (a), QNAH11b (b), and QNAH111 (c) under condition a (see **Scheme 3** in the main text).
